# Supplementary material for: Electrostatics of DNA nucleotide–carbon nanotube hybrids evaluated from QM:MM simulations
Source: Royal Society of Chemistry journal article supplement (doi:10.1039/c5nr03665h), 2015-01-01
Supplement: c5nr03665h1.pdf [file c5nr03665h1.pdf]

**Supporting information for:**

**Electrostatics of DNA Nucleotides-Carbon Nanotube**

**Hybrids Evaluated From QM:MM Simulations**

Morteza Chehel Amirani and Tian Tang\*

*Department of Mechanical Engineering, University of Alberta, Edmonton, AB, Canada*

E-mail: [tian.tang@ualberta.ca](mailto:tian.tang@ualberta.ca)

---

\*To whom correspondence should be addressed

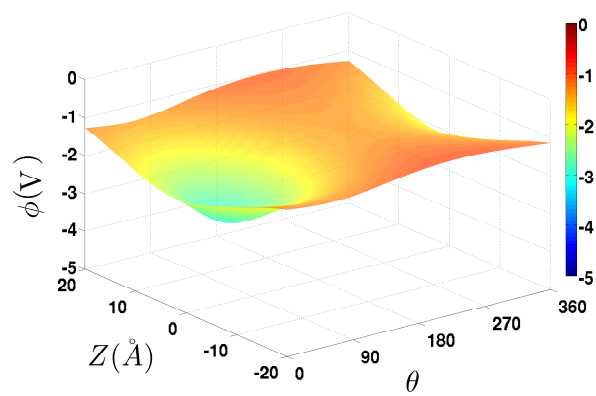

(a) AMP-(7,0) CNT

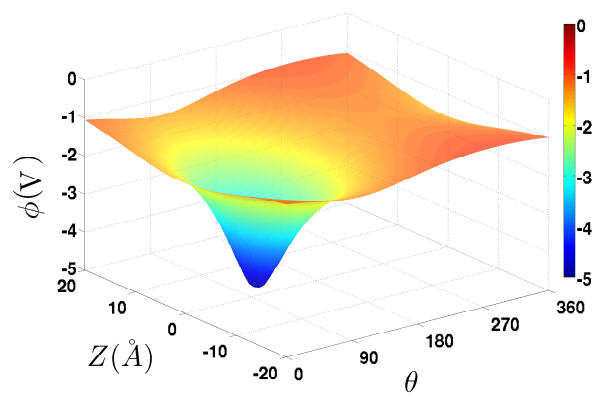

(b) AMP-(4,4)CNT

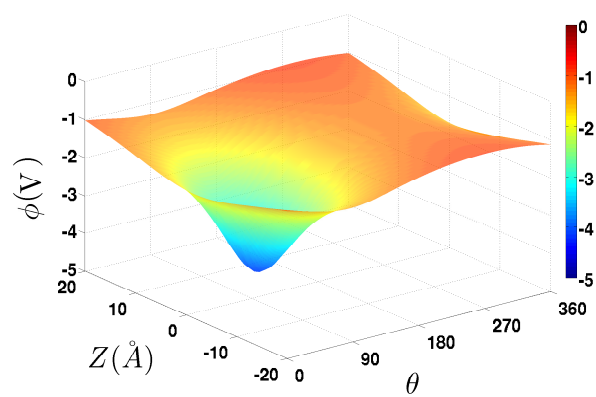

(c) CMP-(7,0) CNT

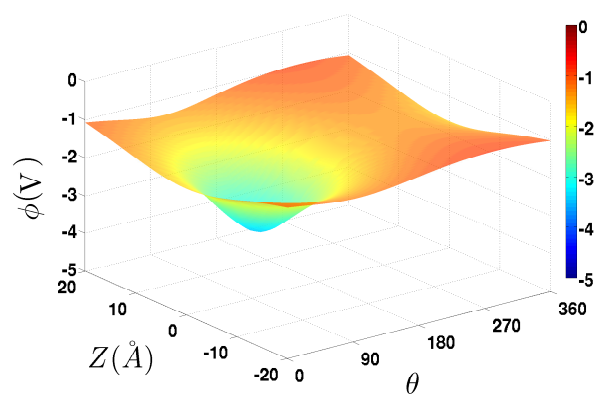

(d) CMP-(4,4)CNT

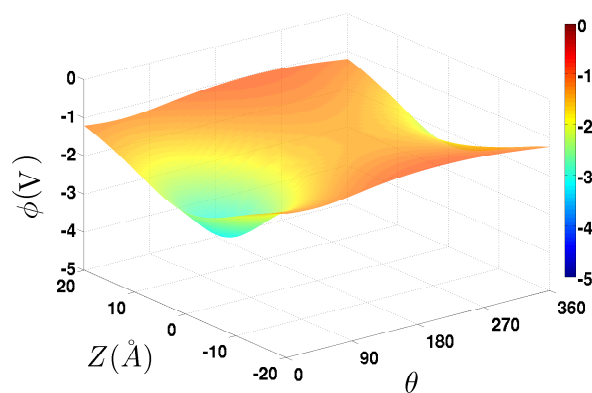

(e) GMP-(7,0) CNT

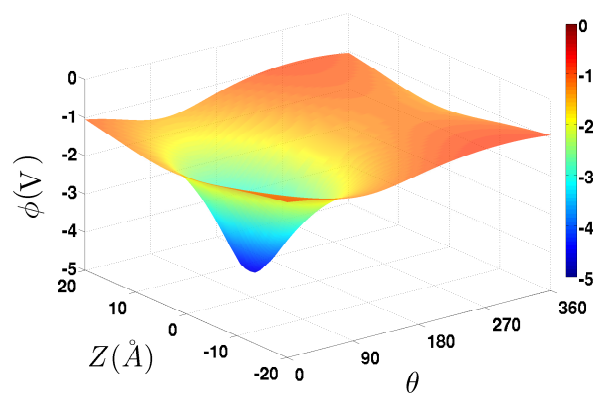

(f) GMP-(4,4) CNT

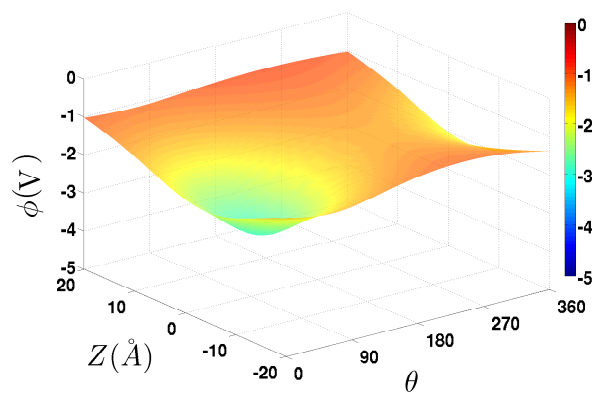

(g) TMP-(7,0) CNT

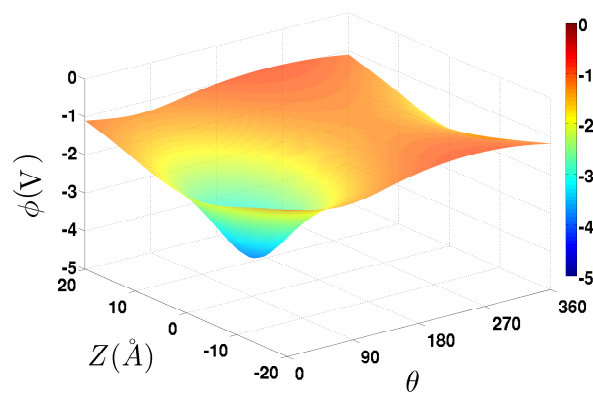

(h) TMP-(4,4) CNT

Figure S1: Distribution of the electrostatic potential  $\phi$  as a function of  $Z$  and  $\theta$ . The radial distance is fixed at  $r=15$  Å.



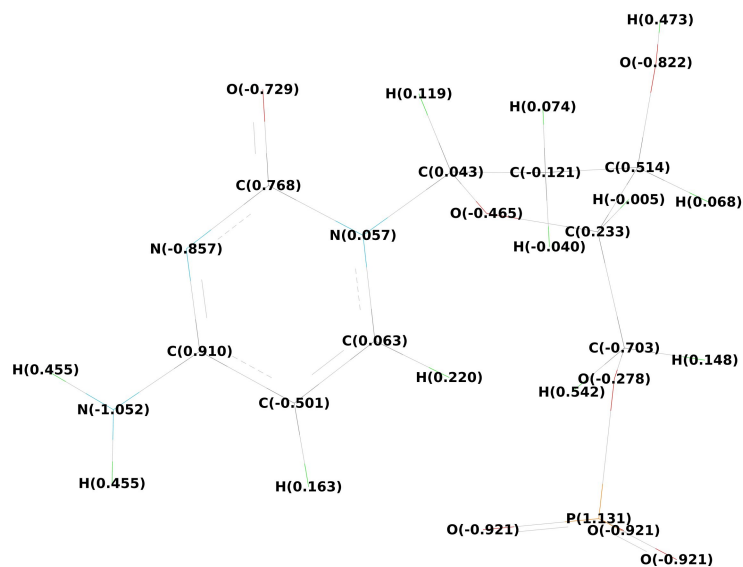

(c)

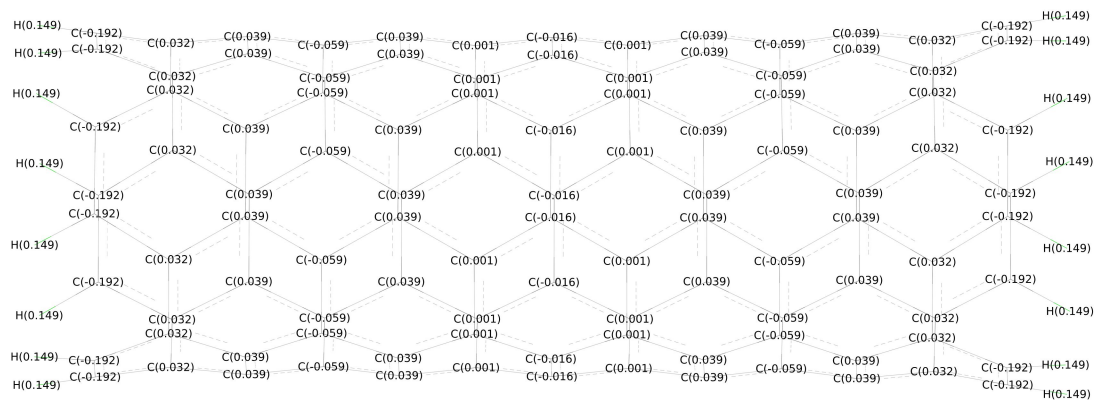

(d)

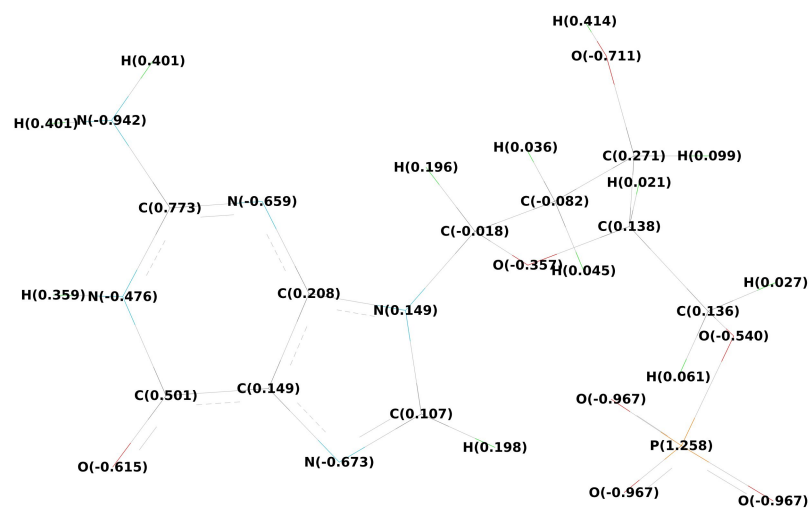

(e)

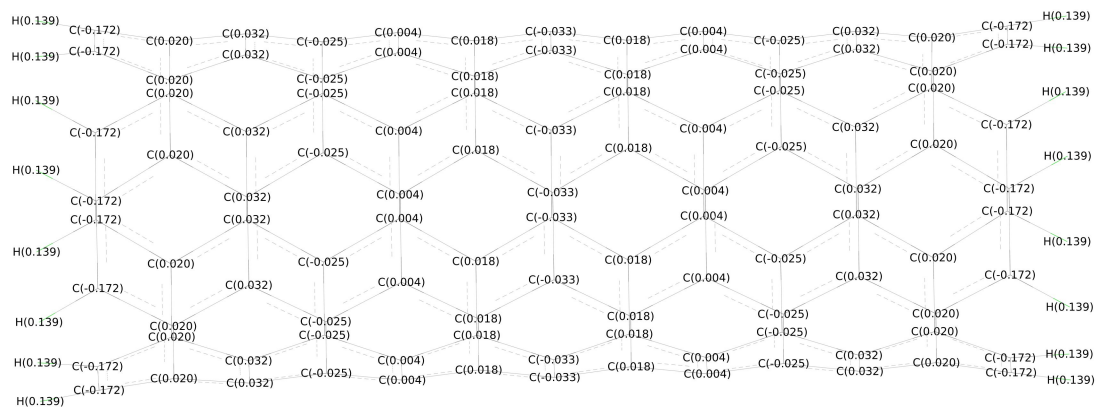

(f)

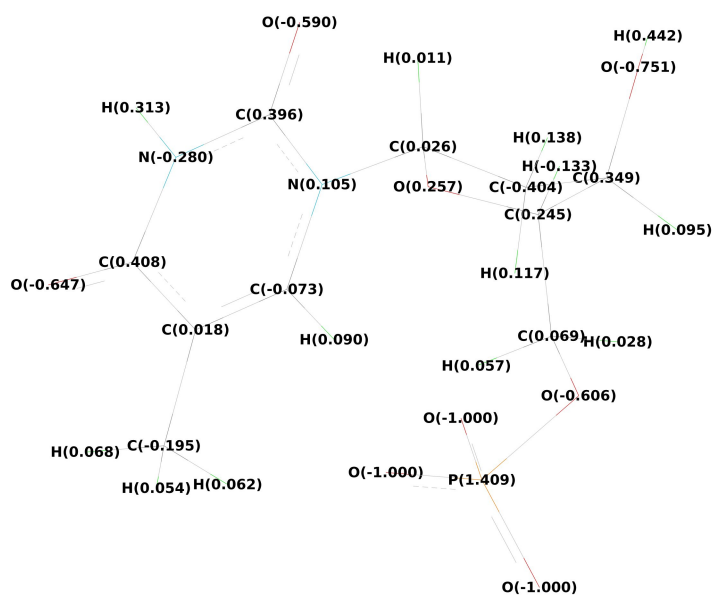

(g)

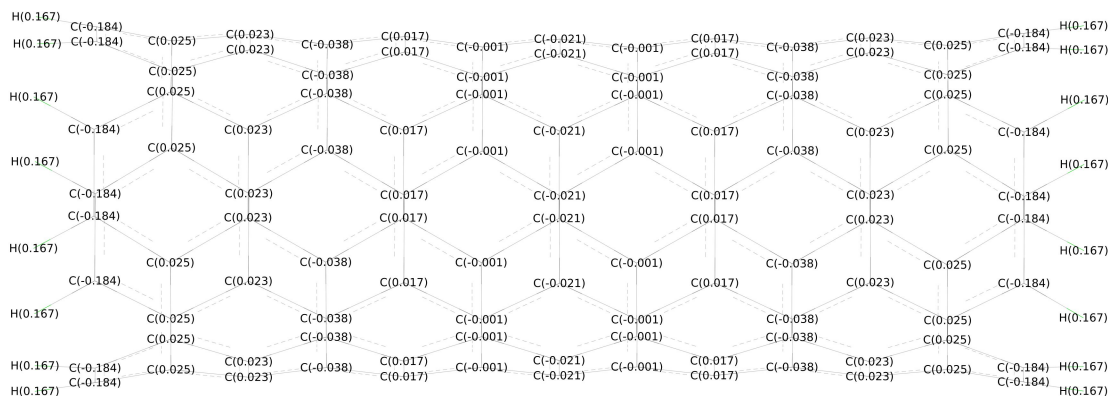

(h)

Figure S2: Atomic partial charges for: (a) AMP in AMP-(4,4) CNT hybrid, (b) (4,4) CNT in AMP-(4,4) CNT hybrid, (c) CMP in CMP-(4,4) CNT hybrid, (d) (4,4) CNT in CMP-(4,4) CNT hybrid, (e) GMP in GMP-(4,4) CNT hybrid, (f) (4,4) CNT in GMP-(4,4) CNT hybrid, (g) TMP in TMP-(4,4) CNT hybrid, and (h) (4,4) CNT in TMP-(4,4) CNT hybrid. Charges were calculated for the optimized structures using resp approach.

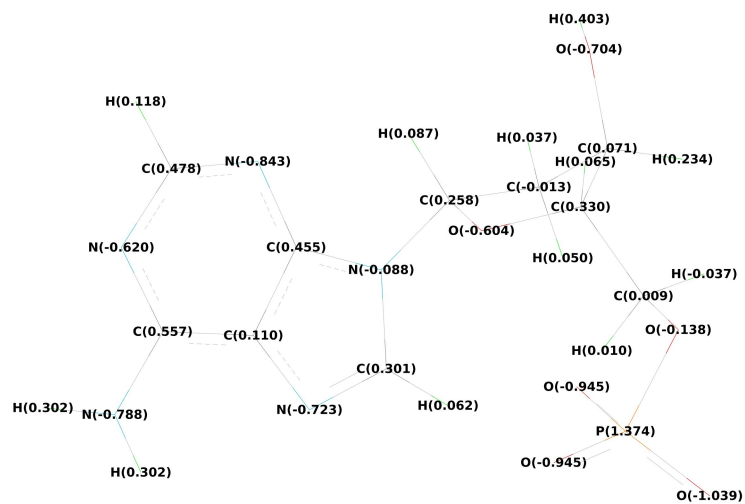

(a)

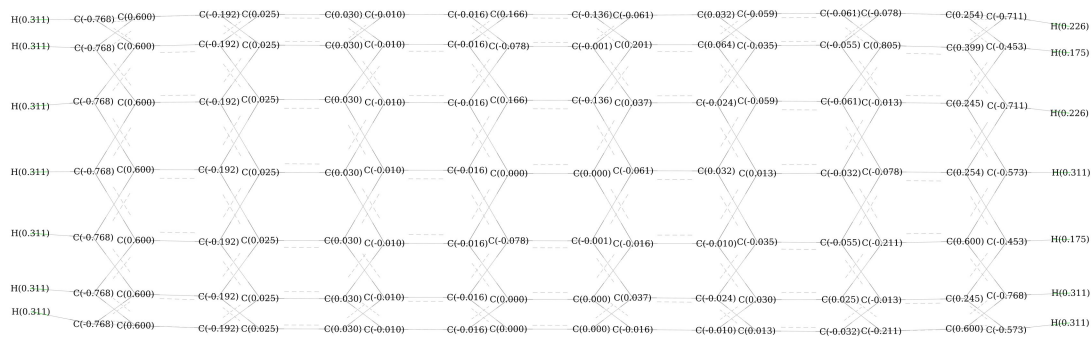

(b)



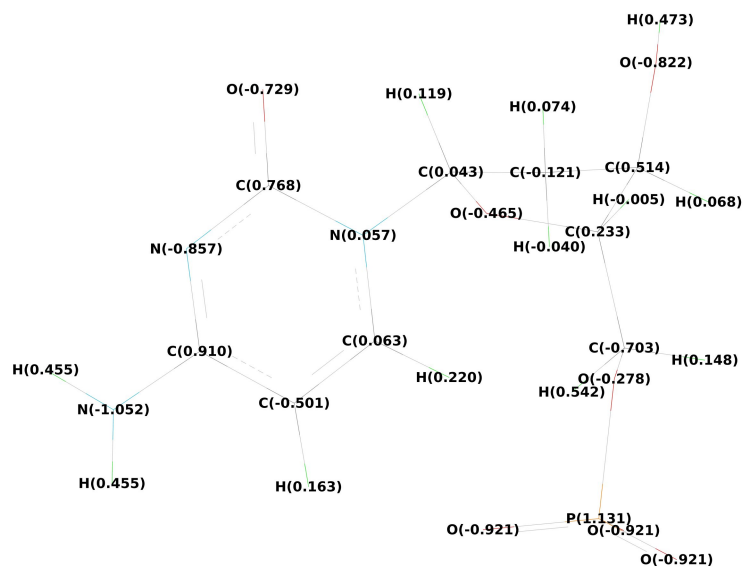

(c)

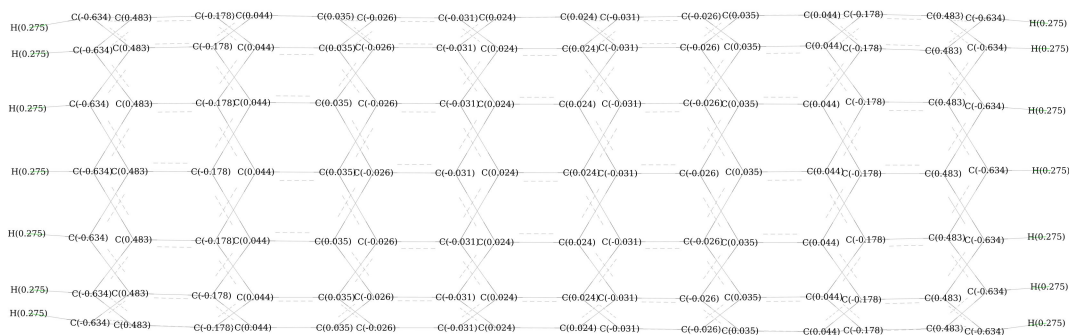

(d)

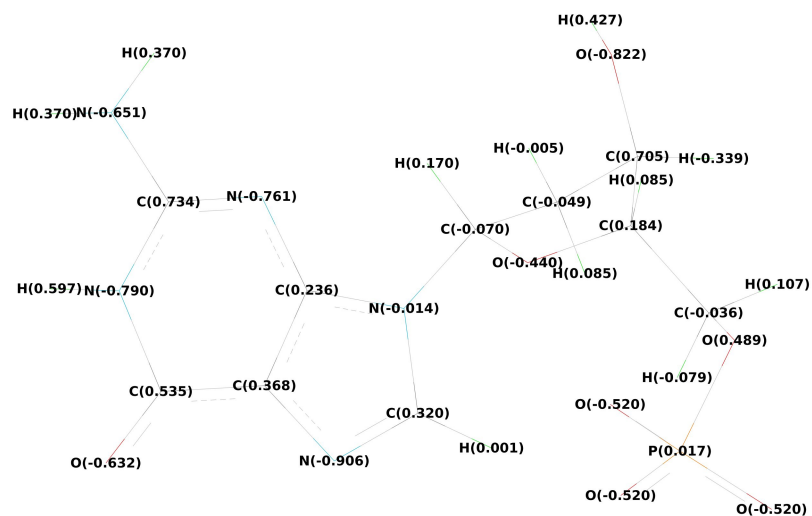

(e)

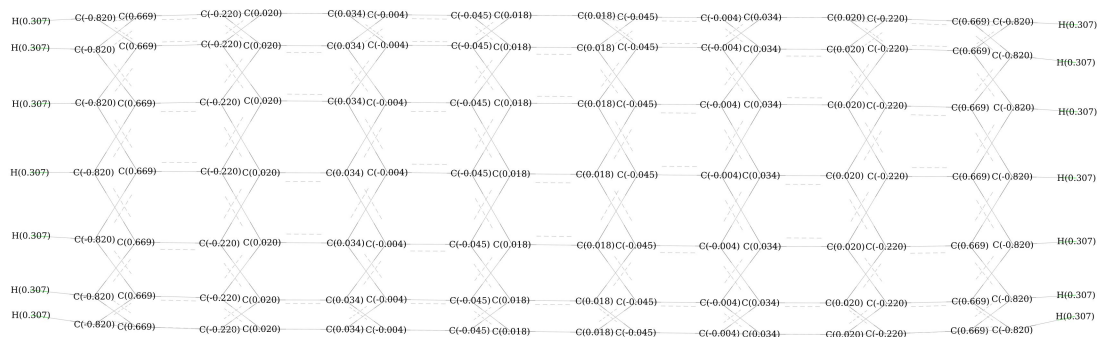

(f)

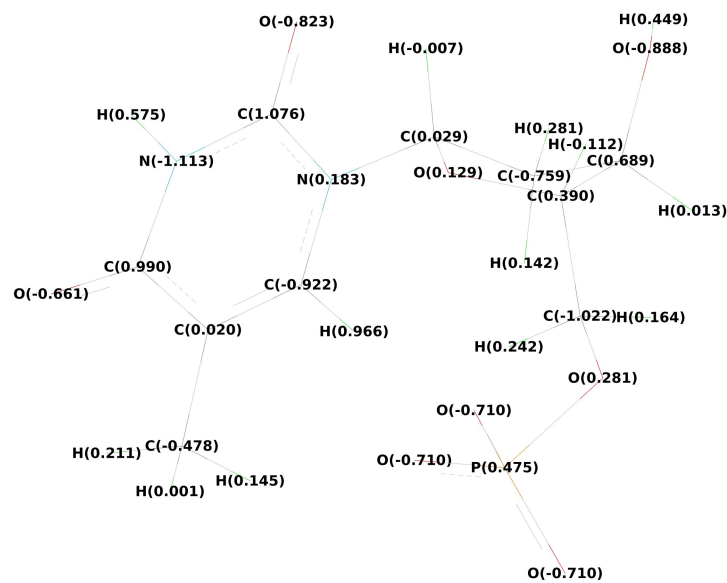

(g)

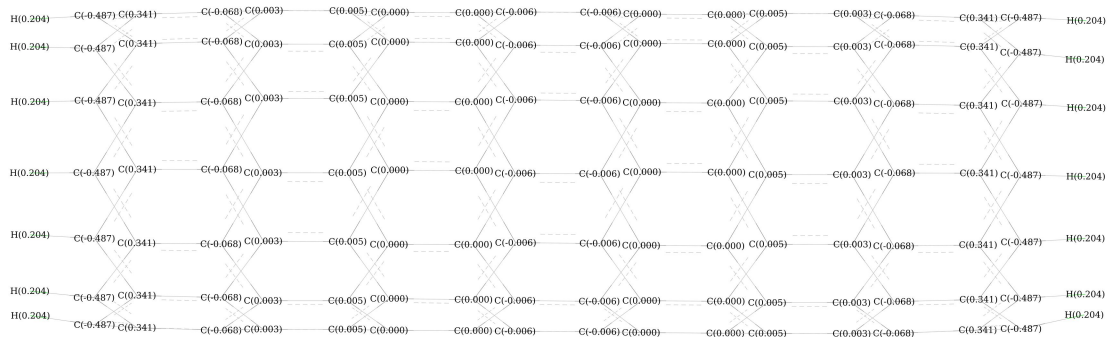

(h)

Figure S3: Atomic partial charges for: (a) AMP in AMP-(7,0) CNT hybrid, (b) (7,0) CNT in AMP-(7,0) CNT hybrid, (c) CMP in CMP-(7,0) CNT hybrid, (d) (7,0) CNT in CMP-(7,0) CNT hybrid, (e) GMP in GMP-(7,0) CNT hybrid, (f) (7,0) CNT in GMP-(7,0) CNT hybrid, (g) TMP in TMP-(7,0) CNT hybrid, and (h) (7,0) CNT in TMP-(7,0) CNT hybrid. Charges were calculated for the optimized structures using resp approach.
